# Supplementary material for: Iodine Status, Thyroid Function, and Birthweight: A Complex Relationship in High-Risk Pregnancies
Source: MDPI journal article supplement (doi:10.3390/jcm9010177), 2020-01-08
Supplement: s1 [file s1]

**Supplementary Table 1:** Correlations between Apgar and pH values in Low-risk and High-risk pregnancies.

| <b>Low-Risk Pregnancies</b>  | 1-minute Apgar         | 5-minute Apgar         | Arterial pH umbilical cord |
|------------------------------|------------------------|------------------------|----------------------------|
| 5-minute Apgar               | $r = 0.739, p < 0.001$ |                        |                            |
| Arterial pH umbilical cord   | $r = 0.526, p < 0.001$ | $r = 0.431, p < 0.001$ |                            |
| Venous pH umbilical cord     | $r = 0.417, p < 0.001$ | $r = 0.311, p < 0.001$ | $r = 0.793, p < 0.001$     |
|                              |                        |                        |                            |
| <b>High-Risk Pregnancies</b> | 1-minute Apgar         | 5-minute Apgar         | Arterial pH umbilical cord |
| 5-minute Apgar               | $r = 0.607, p < 0.001$ |                        |                            |
| Arterial pH umbilical cord   | $r = 0.267, p = 0.015$ | $r = 0.333, p = 0.002$ |                            |
| Venous pH umbilical cord     | $r = 0.256, p = 0.018$ | $r = 0.278, p = 0.010$ | $r = 0.606, p < 0.001$     |
|                              |                        |                        |                            |

**Supplementary Table 2:** Comparisons between babies born at term ( $\geq 37$  weeks of gestation) and preterm babies (gestational age  $< 37$  weeks).

|                   | <b>At term babies<br/>(<math>n= 316</math>)</b> | <b>Preterm babies<br/>(<math>n=18</math>)</b> | <b>p-value</b> |
|-------------------|-------------------------------------------------|-----------------------------------------------|----------------|
| Birth weight (g)  | $3226.44 \pm 528.55$                            | $2226.39 \pm 691.39$                          | $<0.001$       |
| Weight percentile | $48.38 \pm 32.65$                               | $24.06 \pm 32.71$                             | $0.002$        |
| 1-minute Apgar    | $8.78 \pm 0.70$                                 | $8.50 \pm 1.10$                               | $0.302$        |
| 5- minute Apgar   | $9.67 \pm 0.54$                                 | $9.17 \pm 0.62$                               | $<0.001$       |

**Supplementary Table 3:** Maternal and neonatal thyroid function parameters according to intake of supplements, sex of new-born and prematurity.

|                           | Maternal TSH (mIU/L) |             | Maternal FT4 (pmol/L) |             | Neonatal TSH (mIU/L) |             | Neonatal FT4 (pmol/L) |             |
|---------------------------|----------------------|-------------|-----------------------|-------------|----------------------|-------------|-----------------------|-------------|
| Use of iodine supplements |                      |             |                       |             |                      |             |                       |             |
| No                        | 2.83 ± 1.60          | $p = 0.364$ | 12.27 ± 3.12          | $p = 0.156$ | 8.86 ± 7.31          | $p = 0.119$ | 16.36 ± 2.97          | $p = 0.544$ |
| Yes                       | 3.18 ± 2.26          |             | 13.26 ± 3.18          |             | 10.95 ± 7.60         |             | 16.66 ± 2.63          |             |
| Sex of the new-born       |                      |             |                       |             |                      |             |                       |             |
| Male                      | 3.39 ± 2.40          | $p = 0.052$ | 13.11 ± 2.78          | $p = 0.861$ | 10.19 ± 9.78         | $p = 0.150$ | 16.59 ± 3.06          | $p = 0.807$ |
| Female                    | 2.87 ± 1.92          |             | 13.19 ± 3.54          |             | 9.66 ± 5.82          |             | 16.67 ± 2.20          |             |
| Gestational age           |                      |             |                       |             |                      |             |                       |             |
| Preterm                   | 4.00 ± 2.57          | $p = 0.101$ | 14.74 ± 5.91          | $p = 0.367$ | 11.63 ± 5.61         | $p = 0.150$ | 16.42 ± 3.09          | $p = 0.744$ |
| At term                   | 3.08 ± 2.15          |             | 13.05 ± 2.98          |             | 10.87 ± 8.28         |             | 16.64 ± 2.63          |             |
